# Supplementary material for: Heteroarchitecturing a novel three-dimensional hierarchical MoO2/MoS2/carbon electrode material for high-energy and long-life lithium storage
Source: Royal Society of Chemistry journal article supplement (doi:10.1039/d1ta01706c), 2021-01-01
Supplement: d1ta01706c1.pdf [file d1ta01706c1.pdf]

## Supporting Information

### **Heteroarchitecturing a Novel Three-Dimensional Hierarchical MoO<sub>2</sub>/MoS<sub>2</sub>/Carbon Electrode Material for High-Energy and Long-Life Lithium Storage**

Xufei Liu,<sup>a,†</sup> Peng Mei,<sup>b,†,\*</sup> Yu Dou,<sup>a</sup> Rui Luo,<sup>a</sup> Yusuke Yamauchi<sup>c,d,\*</sup> and Yingkui Yang<sup>a,b,\*</sup>

<sup>a</sup> Key Laboratory of Catalysis and Energy Materials Chemistry of Ministry of Education & Hubei Key Laboratory of Catalysis and Materials Science, South-Central University for Nationalities, Wuhan 430074, China. E-mail: ykyang@mail.scuec.edu.cn

<sup>b</sup> Hubei Engineering Technology Research Centre of Energy Polymer Materials, School of Chemistry and Materials Science, South-Central University for Nationalities, Wuhan 430074, China. E-mail: meipeng@scuec.edu.cn

<sup>c</sup> Australian Institute for Bioengineering and Nanotechnology (AIBN) and School of Chemical Engineering, The University of Queensland, Brisbane, QLD 4072, Australia. E-mail: y.yamauchi@uq.edu.au

<sup>d</sup> JST-ERATO Yamauchi Materials Space-Tectonics Project and International Center for Materials Nanoarchitectonics (WPI-MANA), National Institute for Materials Science (NIMS), 1-1 Namiki, Tsukuba, Ibaraki 305-0044, Japan

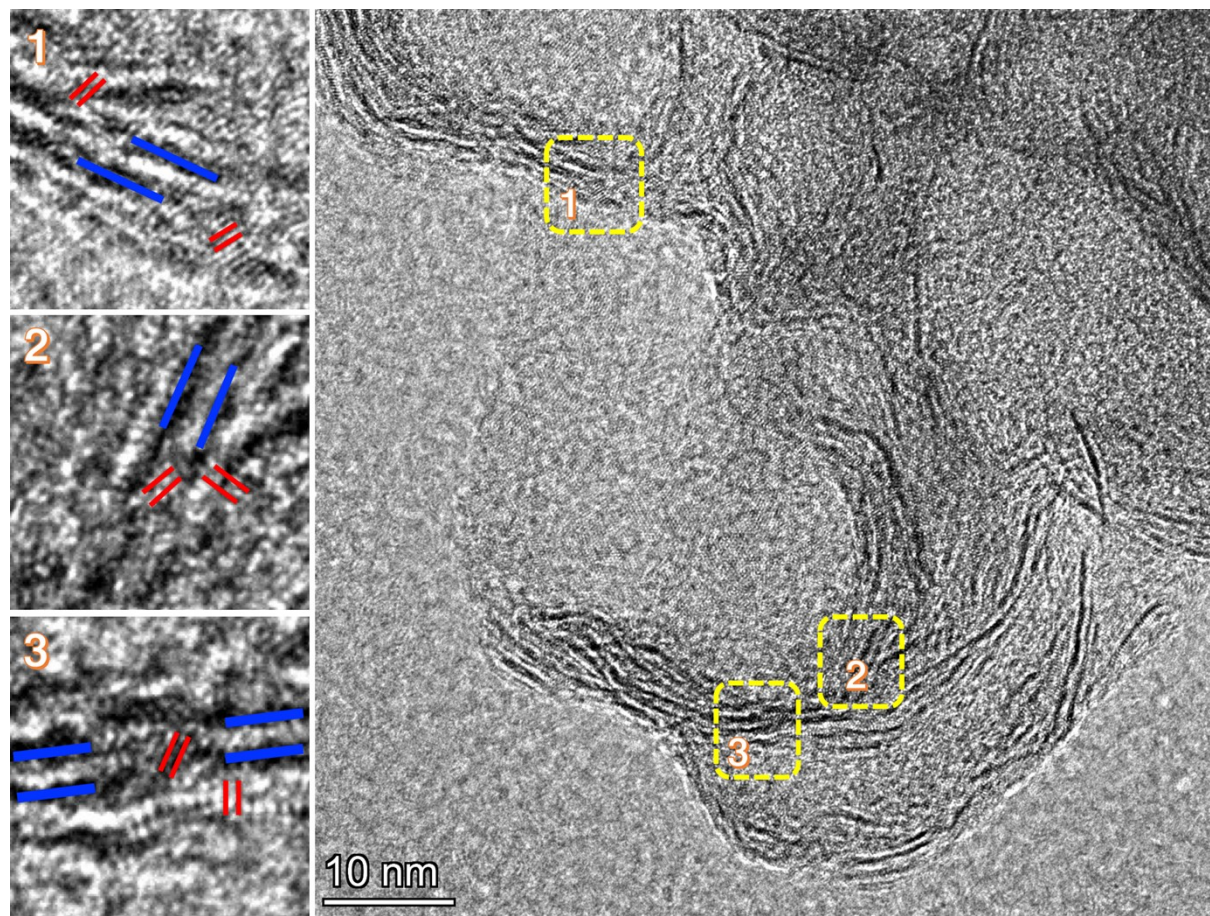

**Figure S1** HRTEM image of MoO<sub>2</sub>/MoS<sub>2</sub>/C with partial enlarged view of the lattice fringes, showing the coexistence of two crystalline phases. The red lines denote the lattice fringes of the MoO<sub>2</sub> phase, while the blue ones indicate the lattice fringes of the MoS<sub>2</sub> phase.

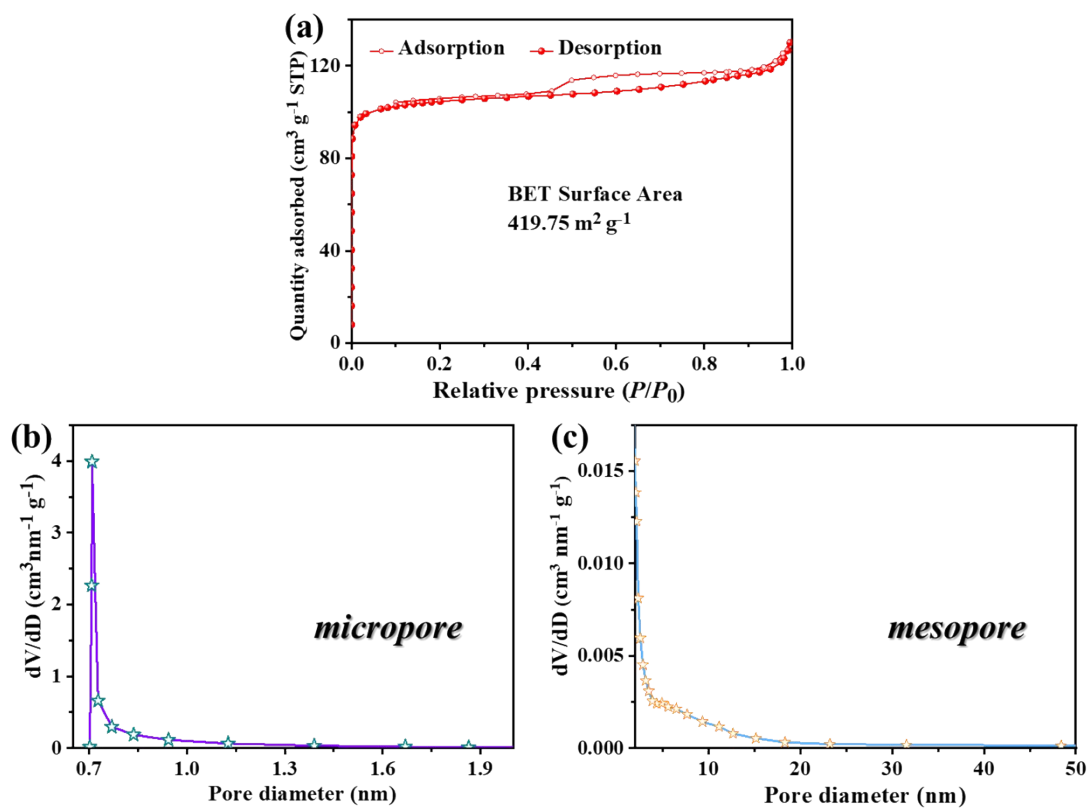

**Figure S2** (a)  $\text{N}_2$  adsorption–desorption isotherm, and (b, c) PSDs of  $\text{MoO}_2/\text{MoS}_2/\text{C}$  in the micropore and mesopore ranges, respectively.

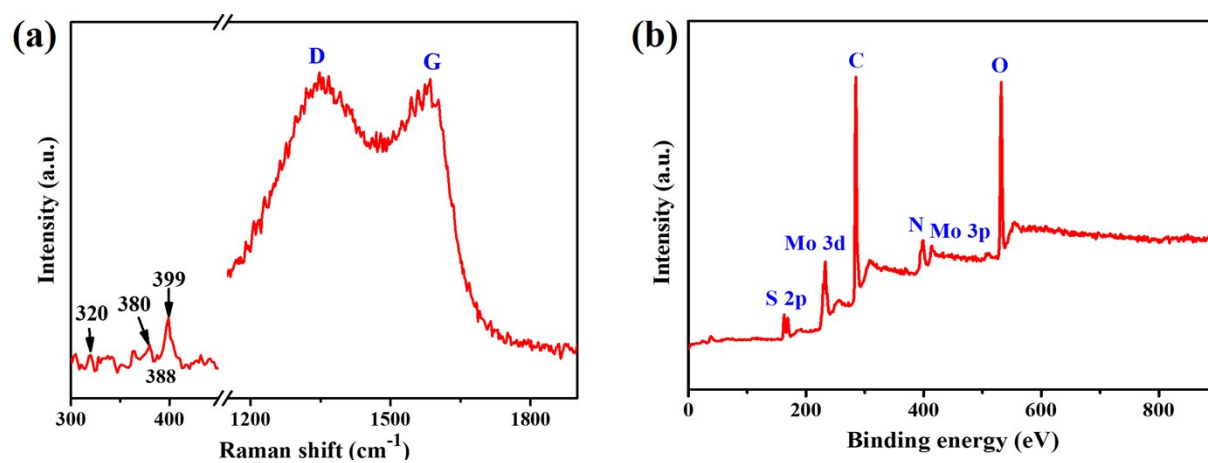

**Figure S3** (a) Raman spectrum and (b) XPS spectrum of  $\text{MoO}_2/\text{MoS}_2/\text{C}$ .



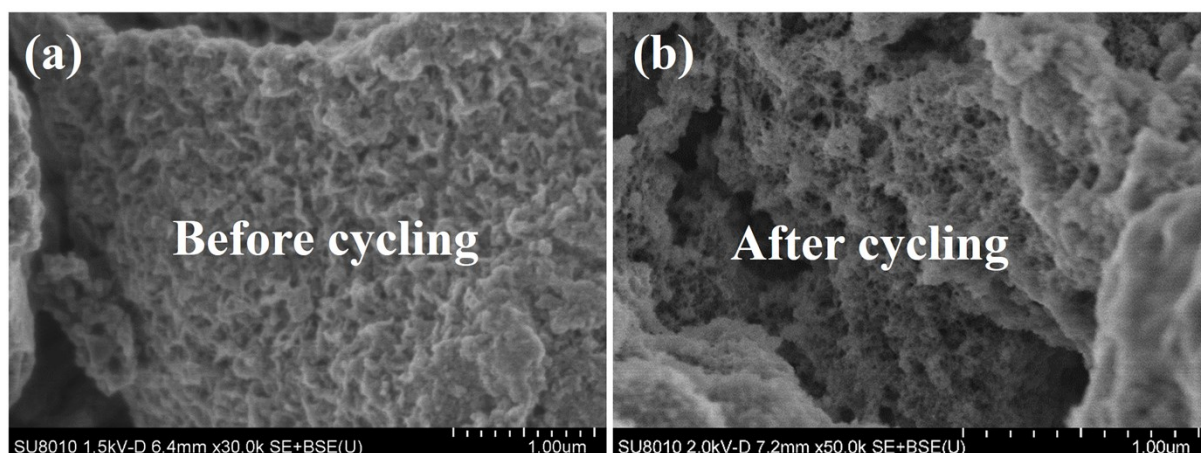

**Figure S4** SEM images of the MoO<sub>2</sub>/MoS<sub>2</sub>/C electrode before (a) and (b) after cycling at 5 A g<sup>-1</sup> for over 2000 cycles.

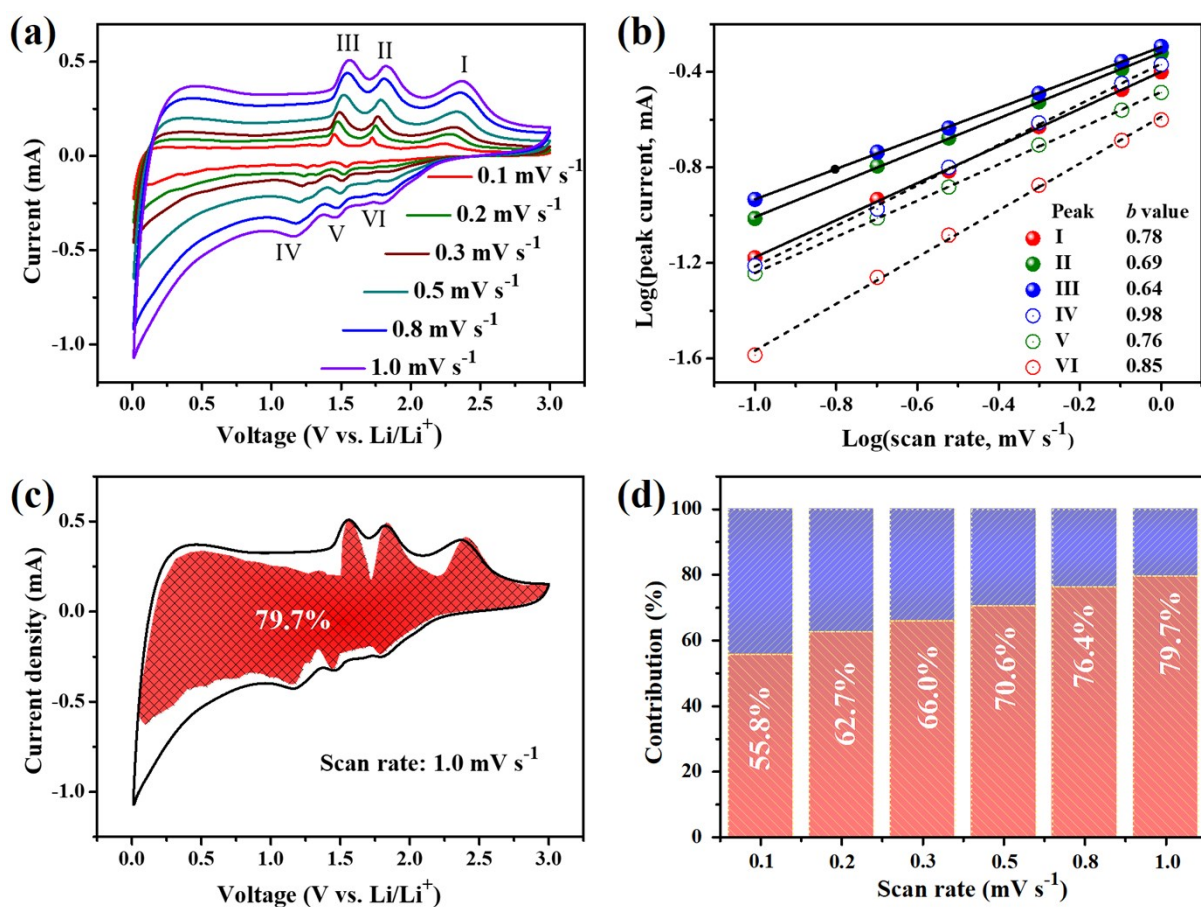

**Figure S5** (a) CV curves at different scan rate. (b) Log *i* vs. log *v* plots at different oxidation and reduction states. (c) Separation of the capacitive and diffusion currents at a scan rate of 1.0 mV s<sup>-1</sup>. (d) Normalized contribution ratio of capacitive and diffusion-controlled capacities at various scan rates.

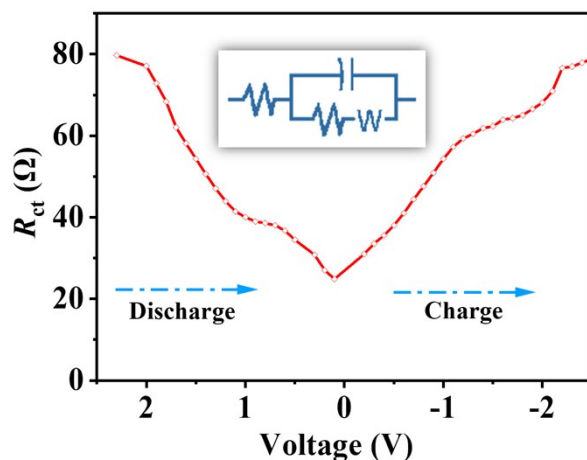

**Figure S6** The fitting data of  $R_{ct}$  values at various charge/discharge voltages. The inset represents the equivalent circuit.

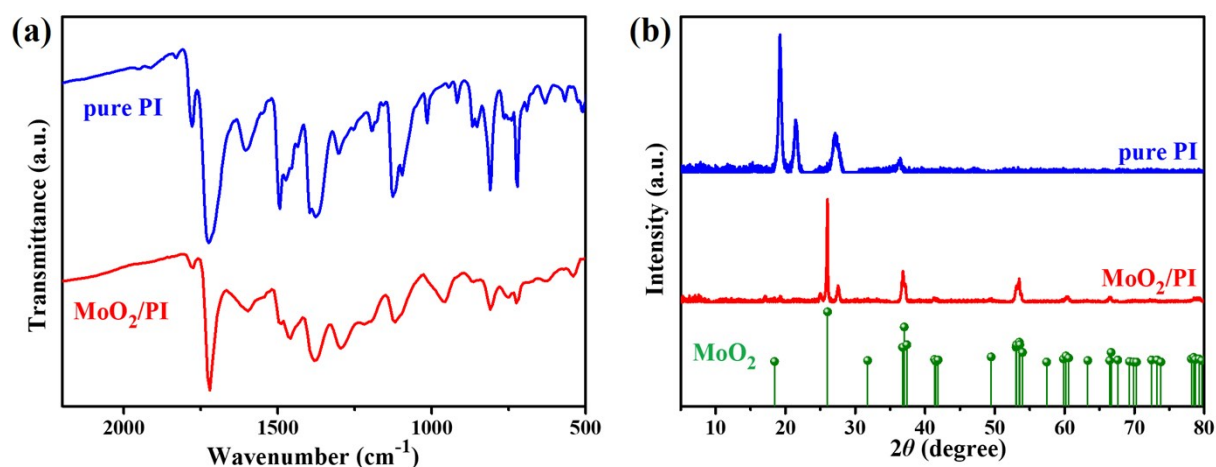

**Figure S7** (a) FTIR spectra and (b) powder XRD patterns of the pure PI and MoO<sub>2</sub>/PI precursors obtained after the hydrothermal polymerization.

**Note for Figure S7:** The appearance of the characteristic absorption peaks (the peaks of C=O at 1720 and 1778 cm<sup>-1</sup>, and the peak of imide C-N at 1380 cm<sup>-1</sup>)<sup>1</sup> in the FT-IR spectra shown in Figure S7a clearly demonstrates the successful synthesis of PI in both cases. The XRD patterns in Figure S7b clarify the existence of both PI and MoO<sub>2</sub> crystal phases, indicating the successful synthesis of MoO<sub>2</sub>/PI composite through the hydrothermal polymerization in the presence of PMo<sub>12</sub>.<sup>2</sup>

**Table S1** The elemental compositions of N-S-C obtained by XPS and CHNS analyses.

| Sample | XPS analysis<br>(atom%) |      |      |      | CHNS analysis<br>(atom%) |      |      |      |
|--------|-------------------------|------|------|------|--------------------------|------|------|------|
|        | C                       | O    | N    | S    | C                        | H    | N    | S    |
| N-S-C  | 88.35                   | 4.91 | 5.25 | 1.48 | 73.97                    | 2.27 | 5.91 | 4.36 |

## References

1. X. Liu, S. Qiu, P. Mei, Q. Zhang and Y. Yang, *J. Mater. Sci.*, 2020, **56**, 3900-3910.
2. J. Xie, K. Zhu, J. Min, L. Yang, J. Luo, J. Liu, M. Lei, R. Zhang, L. Ren and Z. Wang, *Ionics*, 2019, **25**, 1487-1494.
